# Supplementary material for: Theoretical study of the gauche–trans equilibrium with and without an intramolecular hydrogen bond for +H3NCH2CH2X systems (X = OH, NH2, COO−) in solution
Source: Royal Society of Chemistry journal article supplement (doi:10.1039/c2cp42240a), 2012-01-01
Supplement: c2cp42240a.pdf [file c2cp42240a.pdf]

**Theoretical study of the gauche-trans equilibrium with and without an  
intramolecular hydrogen bond for  $^+\text{H}_3\text{NCH}_2\text{CH}_2\text{X}$  systems (X=OH,  
NH<sub>2</sub>, COO<sup>-</sup>) in solution**

Peter I. Nagy

Center for Drug Design and Development, The University of Toledo, Toledo, OH,  
43606-3390; e-mail: pnagy@utnet.utoledo.edu

**Supplementary Information**

Table S1. Major geometric parameters for the  $^+H_3N-CH_2-CH_2-X$  ions and  $H_2N-CH_2-CH_2-COOH$  molecule optimized at the IEF-PCM/B97D/aug-cc-pvtz level in water and chloroform

|                       | water              |                   | chloroform         |                   |
|-----------------------|--------------------|-------------------|--------------------|-------------------|
|                       | gauche             | trans             | gauche             | trans             |
| X = OH                |                    |                   |                    |                   |
| O-H                   | 0.965              | 0.966             | 0.966              | 0.966             |
| N-H <sup>+</sup>      | 1.024,1.020,1.021  | 1.024,1.023,1.024 | 1.025,1.022,1.024  | 1.023,1.025,1.025 |
| O-C                   | 1.433              | 1.428             | 1.430              | 1.422             |
| N-C                   | 1.512              | 1.510             | 1.519              | 1.514             |
| HOC                   | 108.2              | 107.5             | 108.6              | 108.2             |
| OCC                   | 107.0              | 106.4             | 106.9              | 105.9             |
| NCC                   | 109.5              | 109.6             | 109.7              | 109.6             |
| HOCC                  | 168.5              | 180.1             | 173.6              | 179.9             |
| NCCO                  | -60.7              | 180.0             | -59.7              | 180.0             |
| H <sup>+</sup> NCC    | 48.1, 168.0, -71.1 | 60.0,179.8, -60.3 | 53.1, 173.3, -66.0 | 60.1,180.0, -60.1 |
| H <sup>+</sup> ...O   | 2.378              |                   | 2.405              |                   |
| N-H <sup>+</sup> ...O | 104.7              |                   | 102.6              |                   |
| X=NH <sub>2</sub>     |                    |                   |                    |                   |
| N-H                   | 1.015,1.016        | 1.017             | 1.016, 1.014       | 1.016             |
| N <sup>+</sup> -H     | 1.030,1.021,1.022  | 1.023             | 1.038,1.021,1.022  | 1.024             |
| N-C                   | 1.472              | 1.463             | 1.471              | 1.457             |
| N <sup>+</sup> -C     | 1.513              | 1.518             | 1.515              | 1.525             |
| HNC                   | 110.1, 110.4       | 110.1             | 110.9, 110.9       | 111.1             |
| NCC                   | 109.2              | 113.0             | 108.7              | 113.5             |
| N <sup>+</sup> CC     | 108.8              | 110.9             | 107.7              | 110.6             |
| HNCC                  | -80.2, 161.8       | -59.2, 58.2       | -84.0, 156.8       | -60.1, 59.6       |
| N <sup>+</sup> CCN    | -56.4              | 179.9             | -51.1              | 179.6             |
| H <sup>+</sup> NCC    | 45.1, 165.3, -73.1 | 59.7,179.8, -60.2 | 39.6,159.5, -78.0  | 59.4,179.7, -60.2 |
| H <sup>+</sup> ...N   | 2.319              |                   | 2.148              |                   |
| NH <sup>+</sup> ...N  | 109.4              |                   | 114.8              |                   |

Distances in Å, angles in deg. One of the antipodes for the gauche conformers. Trans conformers are of nearly C<sub>s</sub> symmetry from symmetry unrestricted optimizations.

Table 1, continued

|                                                                   | water               |                    | chloroform         |              |
|-------------------------------------------------------------------|---------------------|--------------------|--------------------|--------------|
|                                                                   | gauche              | trans              | gauche             | trans        |
| <b>X=COO<sup>-</sup></b>                                          |                     |                    |                    |              |
| N-H <sup>+</sup>                                                  | 1.092, 1.017, 1.019 | 1.023              |                    | 1.023        |
| N-C                                                               | 1.507               | 1.523              |                    | 1.534        |
| C-C <sub>carb</sub>                                               | 1.554               | 1.562              |                    | 1.576        |
| C-O                                                               | 1.287, 1.248        | 1.263, 1.262       | 1.261, 1.255       |              |
| NCC                                                               | 108.9               | 110.5              |                    | 110.4        |
| CCC                                                               | 114.5               | 113.2              |                    | 112.2        |
| CCO                                                               | 116.4, 118.1        | 117.5, 115.2       | 116.3, 114.7       |              |
| OCO                                                               | 125.5               | 127.3              |                    | 129.0        |
| H <sup>+</sup> NCC                                                | 42.3, 162.8, -74.9  | 61.0, 181.2, -58.7 | 60.3, 180.9, -58.7 |              |
| NCCC                                                              | -54.2               | -179.4             |                    | 179.6        |
| CCCO                                                              | 30.7, -151.0        | 2.3, -177.9        | 1.2, -178.8        |              |
| H <sup>+</sup> ...O                                               | 1.561               |                    |                    |              |
| N-H <sup>+</sup> ...O                                             | 150.0               |                    |                    |              |
| <b>H<sub>2</sub>NCH<sub>2</sub>CH<sub>2</sub>COOH<sup>a</sup></b> |                     |                    |                    |              |
| N-H                                                               | 1.015, 1.016        | 1.018              | 1.014, 1.015       | 1.016        |
| N-C                                                               | 1.485(1.473)        | 1.465              | 1.483              | 1.461        |
| C-C <sub>carb</sub>                                               | 1.532(1.512)        | 1.508              | 1.533              | 1.507        |
| C-O                                                               | 1.223, 1.339(1.357) | 1.219, 1.360       | 1.218, 1.343       | 1.216, 1.362 |
| O-H                                                               | 1.042(0.972)        | 0.974              | 1.025              | 0.973        |
| NCC                                                               | 109.6               | 114.1              | 109.9              | 114.2        |
| CCC                                                               | 114.7               | 110.5              | 115.1              | 110.5        |
| CCO                                                               | 122.8, 116.0        | 125.3, 112.0       | 122.7, 115.9       | 125.4, 111.9 |
| OCO                                                               | 121.2               | 122.7              | 121.4              | 122.6        |
| HOC                                                               | 107.3               | 108.2              | 107.7              | 107.6        |
| NCCC                                                              | -55.6(-61.1)        | 178.5              | -57.0              | 179.4        |
| CCCO                                                              | -147.1, 34.5        | -90.6, 86.3        | -147.1, 34.5       | -88.3, 88.4  |
| H...N                                                             | 1.605               |                    | 1.658              |              |
| N...H-O                                                           | 156.1               |                    | 155.3              |              |

<sup>a</sup>Data for the gauche H<sub>2</sub>NCH<sub>2</sub>CH<sub>2</sub>COOH refer to the -COOH anti conformation. For the more stable syn conformer in aqueous solution, some key geometric parameters are provided in parentheses.

Table S2. Calculated IEF-PCM/B97D/aug-cc-pvtz ELPO fitted CHELPG charges<sup>a</sup>

|                                                                               | Water        |              | Chloroform |              |
|-------------------------------------------------------------------------------|--------------|--------------|------------|--------------|
|                                                                               | gauche       | trans        | gauche     | trans        |
| <sup>+</sup> H <sub>3</sub> NCH <sub>2</sub> CH <sub>2</sub> OH               |              |              |            |              |
| N                                                                             | -0.24        | -0.58        | -0.27      | -0.59        |
| H <sup>+</sup>                                                                | 0.30, 0.32   | 0.39, 0.41   | 0.31, 0.33 | 0.39, 0.41   |
| O                                                                             | -0.63        | -0.70        | -0.61      | -0.66        |
| (O)H                                                                          | 0.43         | 0.45         | 0.43       | 0.44         |
| DM(QM)                                                                        | 16.12        | 20.33        | 15.84      | 19.90        |
| DM(ELPO)                                                                      | 15.90        | 20.30        | 15.75      | 19.88        |
| <sup>+</sup> H <sub>3</sub> NCH <sub>2</sub> CH <sub>2</sub> NH <sub>2</sub>  |              |              |            |              |
| N <sup>+</sup>                                                                | -0.10        | -0.40        | -0.14      | -0.38        |
| H <sup>+</sup>                                                                | 0.22, 0.29   | 0.34, 0.38   | 0.21, 0.29 | 0.33, 0.37   |
| N                                                                             | -0.89        | -1.00        | -0.83      | -0.92        |
| (N)H                                                                          | 0.35, 0.36   | 0.37         | 0.35       | 0.36         |
| DM(QM)                                                                        | 14.06        | 19.36        | 13.49      | 18.79        |
| DM(ELPO)                                                                      | 14.01        | 19.24        | 13.36      | 18.81        |
| <sup>+</sup> H <sub>3</sub> NCH <sub>2</sub> CH <sub>2</sub> COO <sup>-</sup> |              |              |            |              |
| N                                                                             | -0.52        | -0.46        |            | -0.48        |
| H <sup>+</sup>                                                                | 0.35, 0.37   | 0.36         |            | 0.35         |
| C                                                                             | 0.88         | 0.91         |            | 0.89         |
| O                                                                             | -0.81, -0.82 | -0.86, -0.87 |            | -0.82, -0.83 |
| DM(QM)                                                                        | 14.02        | 21.18        |            | 19.74        |
| DM(ELPO)                                                                      | 13.87        | 21.00        |            | 19.55        |
| H <sub>2</sub> NCH <sub>2</sub> CH <sub>2</sub> COOH                          |              |              |            |              |
| N                                                                             | -0.74        | -1.05        | -0.72      | -1.00        |
| (N)H                                                                          | 0.32         | 0.38         | 0.31       | 0.36         |
| O=                                                                            | -0.67        | -0.62        | -0.63      | -0.59        |
| O(H)                                                                          | -0.64        | -0.58        | -0.60      | -0.57        |
| (O)H                                                                          | 0.36         | 0.43         | 0.34       | 0.42         |
| DM(QM)                                                                        | 9.04         | 2.57         | 8.20       | 2.37         |
| DM(ELPO)                                                                      | 8.96         | 2.57         | 8.14       | 2.37         |

<sup>a</sup>Atomic charges in charge units, dipole moments in D.
